# Supplementary material
Source: publisher figshare collection journal article supplement (https://acs.figshare.com/ndownloader/files/4497631)
Supplement: Supplementary file 1 [file 4497631]

data_dimerized_1  

#data_9325 

  

_audit_creation_method            SHELXL-97 

_chemical_name_systematic 

; 

 ? 

; 

_chemical_name_common             ? 

_chemical_melting_point           ? 

_chemical_formula_moiety          ? 

_chemical_formula_sum 

 'C16 H14 N2 O4' 

_chemical_formula_weight          298.29 

  

loop_ 

 _atom_type_symbol 

 _atom_type_description 

 _atom_type_scat_dispersion_real 

 _atom_type_scat_dispersion_imag 

 _atom_type_scat_source 

 'C'  'C'   0.0033   0.0016 

 'International Tables Vol C Tables 4.2.6.8 and 6.1.1.4' 

 'H'  'H'   0.0000   0.0000 

 'International Tables Vol C Tables 4.2.6.8 and 6.1.1.4' 

 'N'  'N'   0.0061   0.0033 

 'International Tables Vol C Tables 4.2.6.8 and 6.1.1.4' 

 'O'  'O'   0.0106   0.0060 

 'International Tables Vol C Tables 4.2.6.8 and 6.1.1.4' 

  

_symmetry_cell_setting            Monoclinic 

_symmetry_space_group_name_H-M    P2(1)/c 

  

loop_ 

 _symmetry_equiv_pos_as_xyz 

 'x, y, z' 

 '-x, y+1/2, -z+1/2' 

 '-x, -y, -z' 

 'x, -y-1/2, z-1/2' 

  

_cell_length_a                    5.9012(7) 

_cell_length_b                    6.9480(8) 

_cell_length_c                    16.0585(19) 

_cell_angle_alpha                 90.00 

_cell_angle_beta                  99.931(2) 

_cell_angle_gamma                 90.00 

_cell_volume                      648.56(13) 

_cell_formula_units_Z             2 

_cell_measurement_temperature     100(2) 

_cell_measurement_reflns_used     2773 

_cell_measurement_theta_min       2.58 

_cell_measurement_theta_max       27.41 

  

_exptl_crystal_description        Block 

_exptl_crystal_colour             Colourless 

_exptl_crystal_size_max           0.40 

_exptl_crystal_size_mid           0.32 

_exptl_crystal_size_min           0.24 

_exptl_crystal_density_meas       'Not Measured' 

_exptl_crystal_density_diffrn     1.527 

_exptl_crystal_density_method     'not measured' 

_exptl_crystal_F_000              312 

_exptl_absorpt_coefficient_mu     0.112 

_exptl_absorpt_correction_type    Multi-scan 

_exptl_absorpt_correction_T_min   0.9567 

_exptl_absorpt_correction_T_max   0.9737 

_exptl_absorpt_process_details    'Sadabs, (Sheldrick 2004)'

  

_exptl_special_details 

; 

 ? 

; 

  

_diffrn_ambient_temperature       100(2) 

_diffrn_radiation_wavelength      0.71073 

_diffrn_radiation_type            MoK\a 

_diffrn_radiation_source          'fine-focus sealed tube' 

_diffrn_radiation_monochromator   graphite 

_diffrn_measurement_device_type   'CCD area detector' 

_diffrn_measurement_method        'phi and omega scans' 

_diffrn_detector_area_resol_mean  ? 

_diffrn_standards_number          ? 

_diffrn_standards_interval_count  ? 

_diffrn_standards_interval_time   ? 

_diffrn_standards_decay_%         ? 

_diffrn_reflns_number             4332 

_diffrn_reflns_av_R_equivalents   0.0229 

_diffrn_reflns_av_sigmaI/netI     0.0265 

_diffrn_reflns_limit_h_min        -7 

_diffrn_reflns_limit_h_max        6 

_diffrn_reflns_limit_k_min        -9 

_diffrn_reflns_limit_k_max        9 

_diffrn_reflns_limit_l_min        -15 

_diffrn_reflns_limit_l_max        20 

_diffrn_reflns_theta_min          2.58 

_diffrn_reflns_theta_max          27.44 

_reflns_number_total              1466 

_reflns_number_gt                 1376 

_reflns_threshold_expression      >2sigma(I) 

  

_computing_data_collection        'Bruker SMART' 

_computing_cell_refinement        'Bruker SMART' 

_computing_data_reduction         'Bruker SAINT' 

_computing_structure_solution     'SHELXS-97 (Sheldrick, 1990)' 

_computing_structure_refinement   'SHELXL-97 (Sheldrick, 1997)' 

_computing_molecular_graphics     'Bruker SHELXTL' 

_computing_publication_material   'Bruker SHELXTL' 

  

_refine_special_details 

; 

 Refinement of F^2^ against ALL reflections.  The weighted R-factor wR and 

 goodness of fit S are based on F^2^, conventional R-factors R are based 

 on F, with F set to zero for negative F^2^. The threshold expression of 

 F^2^ > 2sigma(F^2^) is used only for calculating R-factors(gt) etc. and is 

 not relevant to the choice of reflections for refinement.  R-factors based 

 on F^2^ are statistically about twice as large as those based on F, and R- 

 factors based on ALL data will be even larger. 

; 

  

_refine_ls_structure_factor_coef  Fsqd 

_refine_ls_matrix_type            full 

_refine_ls_weighting_scheme       calc 

_refine_ls_weighting_details 

 'calc w=1/[\s^2^(Fo^2^)+(0.0864P)^2^+0.5080P] where P=(Fo^2^+2Fc^2^)/3' 

_atom_sites_solution_primary      direct 

_atom_sites_solution_secondary    difmap 

_atom_sites_solution_hydrogens    geom 

_refine_ls_hydrogen_treatment     constr

_refine_ls_extinction_method      none 

_refine_ls_extinction_coef        ? 

_refine_ls_number_reflns          1466 

_refine_ls_number_parameters      101 

_refine_ls_number_restraints      0 

_refine_ls_R_factor_all           0.0517 

_refine_ls_R_factor_gt            0.0493 

_refine_ls_wR_factor_ref          0.1536 

_refine_ls_wR_factor_gt           0.1510 

_refine_ls_goodness_of_fit_ref    1.131 

_refine_ls_restrained_S_all       1.131 

_refine_ls_shift/su_max           0.000 

_refine_ls_shift/su_mean          0.000 

  

loop_ 

 _atom_site_label 

 _atom_site_type_symbol 

 _atom_site_fract_x 

 _atom_site_fract_y 

 _atom_site_fract_z 

 _atom_site_U_iso_or_equiv 

 _atom_site_adp_type 

 _atom_site_occupancy 

 _atom_site_symmetry_multiplicity 

 _atom_site_calc_flag 

 _atom_site_refinement_flags 

 _atom_site_disorder_assembly 

 _atom_site_disorder_group 

O1 O 0.2410(2) 0.89714(18) 0.07988(8) 0.0175(3) Uani 1 1 d . . . 

H1 H 0.3724 0.9396 0.0999 0.026 Uiso 1 1 calc R . . 

O2 O 0.4348(2) 0.7283(2) -0.00342(8) 0.0216(3) Uani 1 1 d . . . 

N1 N 0.3768(2) 0.4754(2) 0.31226(9) 0.0148(3) Uani 1 1 d . . . 

C1 C -0.0437(3) 0.5165(2) 0.06462(10) 0.0130(4) Uani 1 1 d . . . 

H1A H -0.2064 0.5447 0.0704 0.016 Uiso 1 1 calc R . . 

C2 C 0.0352(3) 0.6548(2) -0.00326(10) 0.0133(4) Uani 1 1 d . . . 

H2 H -0.0910 0.7460 -0.0265 0.016 Uiso 1 1 calc R . . 

C3 C 0.1641(3) 0.5491(2) 0.30120(10) 0.0154(4) Uani 1 1 d . . . 

H3 H 0.1053 0.5914 0.3495 0.018 Uiso 1 1 calc R . . 

C4 C 0.0255(3) 0.5665(2) 0.22251(10) 0.0145(4) Uani 1 1 d . . . 

H4 H -0.1235 0.6216 0.2177 0.017 Uiso 1 1 calc R . . 

C5 C 0.1056(3) 0.5028(2) 0.15042(10) 0.0132(4) Uani 1 1 d . . . 

C6 C 0.3268(3) 0.4250(2) 0.16190(10) 0.0149(4) Uani 1 1 d . . . 

H6 H 0.3894 0.3794 0.1149 0.018 Uiso 1 1 calc R . . 

C7 C 0.4540(3) 0.4151(2) 0.24301(11) 0.0152(4) Uani 1 1 d . . . 

H7 H 0.6047 0.3625 0.2498 0.018 Uiso 1 1 calc R . . 

C8 C 0.2593(3) 0.7615(2) 0.02324(10) 0.0137(4) Uani 1 1 d . . . 

  

loop_ 

 _atom_site_aniso_label 

 _atom_site_aniso_U_11 

 _atom_site_aniso_U_22 

 _atom_site_aniso_U_33 

 _atom_site_aniso_U_23 

 _atom_site_aniso_U_13 

 _atom_site_aniso_U_12 

O1 0.0162(6) 0.0176(6) 0.0177(6) -0.0054(5) 0.0000(5) -0.0015(5) 

O2 0.0183(6) 0.0250(7) 0.0225(7) -0.0064(5) 0.0065(5) -0.0032(5) 

N1 0.0170(7) 0.0137(7) 0.0128(6) 0.0009(5) 0.0003(5) -0.0012(5) 

C1 0.0133(7) 0.0130(8) 0.0125(8) -0.0003(6) 0.0012(6) -0.0002(6) 

C2 0.0144(8) 0.0127(8) 0.0119(7) -0.0003(5) -0.0002(6) 0.0007(6) 

C3 0.0188(8) 0.0151(8) 0.0129(8) -0.0014(6) 0.0044(6) -0.0005(6) 

C4 0.0145(7) 0.0126(8) 0.0161(8) 0.0000(6) 0.0022(6) -0.0002(6) 

C5 0.0146(8) 0.0112(8) 0.0133(7) -0.0002(6) 0.0009(6) -0.0025(6) 

C6 0.0165(8) 0.0148(8) 0.0138(8) -0.0012(6) 0.0039(6) -0.0001(6) 

C7 0.0143(8) 0.0140(8) 0.0170(8) -0.0001(6) 0.0018(6) 0.0004(6) 

C8 0.0170(8) 0.0124(8) 0.0107(7) 0.0015(6) -0.0001(6) 0.0001(6) 

  

_geom_special_details 

; 

 All esds (except the esd in the dihedral angle between two l.s. planes) 

 are estimated using the full covariance matrix.  The cell esds are taken 

 into account individually in the estimation of esds in distances, angles 

 and torsion angles; correlations between esds in cell parameters are only 

 used when they are defined by crystal symmetry.  An approximate (isotropic) 

 treatment of cell esds is used for estimating esds involving l.s. planes. 

; 

  

loop_ 

 _geom_bond_atom_site_label_1 

 _geom_bond_atom_site_label_2 

 _geom_bond_distance 

 _geom_bond_site_symmetry_2 

 _geom_bond_publ_flag 

O1 C8 1.327(2) . ? 

O2 C8 1.209(2) . ? 

N1 C3 1.339(2) . ? 

N1 C7 1.340(2) . ? 

C1 C5 1.505(2) . ? 

C1 C2 1.552(2) 3_565 ? 

C1 C2 1.582(2) . ? 

C2 C8 1.512(2) . ? 

C2 C1 1.552(2) 3_565 ? 

C3 C4 1.387(2) . ? 

C4 C5 1.396(2) . ? 

C5 C6 1.396(2) . ? 

C6 C7 1.388(2) . ? 

  

loop_ 

 _geom_angle_atom_site_label_1 

 _geom_angle_atom_site_label_2 

 _geom_angle_atom_site_label_3 

 _geom_angle 

 _geom_angle_site_symmetry_1 

 _geom_angle_site_symmetry_3 

 _geom_angle_publ_flag 

C3 N1 C7 117.07(14) . . ? 

C5 C1 C2 117.06(13) . 3_565 ? 

C5 C1 C2 118.28(13) . . ? 

C2 C1 C2 89.01(12) 3_565 . ? 

C8 C2 C1 115.61(13) . 3_565 ? 

C8 C2 C1 116.80(13) . . ? 

C1 C2 C1 91.00(12) 3_565 . ? 

N1 C3 C4 123.11(15) . . ? 

C3 C4 C5 119.81(15) . . ? 

C6 C5 C4 117.14(14) . . ? 

C6 C5 C1 122.14(14) . . ? 

C4 C5 C1 120.71(14) . . ? 

C7 C6 C5 119.04(15) . . ? 

N1 C7 C6 123.83(15) . . ? 

O2 C8 O1 123.64(15) . . ? 

O2 C8 C2 124.60(15) . . ? 

O1 C8 C2 111.76(13) . . ? 

  

loop_ 

 _geom_hbond_atom_site_label_D 

 _geom_hbond_atom_site_label_H 

 _geom_hbond_atom_site_label_A 

 _geom_hbond_distance_DH 

 _geom_hbond_distance_HA 

 _geom_hbond_distance_DA 

 _geom_hbond_angle_DHA 

 _geom_hbond_site_symmetry_A 

O1 H1 N1  0.84 1.88 2.6527(19) 152.9 2_655 

  

_diffrn_measured_fraction_theta_max    0.991 

_diffrn_reflns_theta_full              27.44 

_diffrn_measured_fraction_theta_full   0.991 

_refine_diff_density_max    0.512 

_refine_diff_density_min   -0.269 

_refine_diff_density_rms    0.083 
